# Supplementary material for: Tetraarylethene fluorescent dyes with aggregation-induced emission for LED-driven photocuring and 3D printing
Source: Royal Society of Chemistry journal article supplement (doi:10.1039/d2ma00280a), 2022-01-01
Supplement: d2ma00280a1.pdf [file d2ma00280a1.pdf]

## Supporting information

### **Tetraarylethenes fluorescent dyes with aggregation-induced emission for LED-driven photocuring and 3D printing**

Dongxiao Li#, Yimei Liu#, Binghui Bao, Yao Du, Jian You, Luhang Zhang, Haitao Zhan, Tao Wang \*

*Department of Organic Chemistry, College of Chemistry, Beijing University of Chemical Technology, Beijing, 100029, PR China*

\* Corresponding author. Department of Organic Chemistry, College of Chemistry, Beijing University of Chemical Technology, Beijing, 100029, PR China.  
E-mail address: wangtwj2000@163.com (T. Wang).

**#Dongxiao Li and Yimei Liu contributed equally to this manuscript.**

#### **1. Experimental Section**

##### **1.1 Detail information of the raw materials, initiators and monomers**

The reagents and solvents required for the synthesis of tetrastylene-based derivatives were of reagent grade and do not require purification. Diphenyl(2,4,6-trimethylbenzoyl)phosphine oxide (TPO) and diaryliodonium salt (ONI) were synthesized according to literature as photoinitiator. Tripropylene glycol diacrylate (TPGDA), trimethylolpropane triacrylate (TMPTA), polyethylene Glycol acrylate (PEG) were chosen as the monomers for free radical photopolymerization (FRP) and E51 epoxy was chosen as the monomer for cationic photopolymerization (CP). These monomers were all from Guangzhou Lihou Trading Co. Ltd, China. N-ethyl-carbazole (Cz-bi) and N-hexyl-carbazole (Cz-hex) were prepared according to literature procedures.

##### **1.2 Photopolymerization experiment**

A Fourier transform infrared spectrometer (Nicolet 5700, 4000-7000  $\text{cm}^{-1}$  wavelength range) was used to record the infrared spectrum of the uncured resin, and the infrared spectrum was recorded at different exposure time intervals. The double bond conversion rate is calculated by the change of absorption intensity at  $6165 \text{ cm}^{-1}$ , and the double bond conversion rate is calculated by the formula (1):

$$Conversion\% = \left[ 1 - \frac{S_t}{S_0} \right] \times 100\% \quad (1)$$

In this formula,  $S_0, S_t$  are the peak areas of the carbon-carbon double bond absorption peak before and after curing, respectively.

The characteristic absorption peak of the epoxy group is at  $6075 \text{ cm}^{-1}$ , and the peak at  $4680 \text{ cm}^{-1}$  is used as a reference. The conversion rate of the epoxy group is calculated by comparing the changes in the peak areas of the two peaks. The conversion rate is calculated by the formula (2) Calculated:

$$Conversion\% = \left[ 1 - \left( \frac{S_t}{R_t} / \frac{S_0}{R_0} \right) \right] \times 100\% \quad (2)$$

In this formula,  $S_0, S_t$  are the peak areas of the epoxy group absorption peak before and after curing,  $R_0, R_t$  are the peak areas of the reference peak before and after curing, respectively.

The photopolymerization experiment is the same as above. The equipment used to monitor the photopolymerization reaction is an F-4500 (Hitachi High-Technologies Corporation) fluorescence spectrophotometer. Calculate the fluorescence intensity by formula (3):

$$I = I_t / I_0 \quad (3)$$

In this formula,  $I_0, I_t$  are the areas of the largest emission peaks before and after curing, respectively.

## 2. Characterization

### 2.1 NMR spectra of dyes

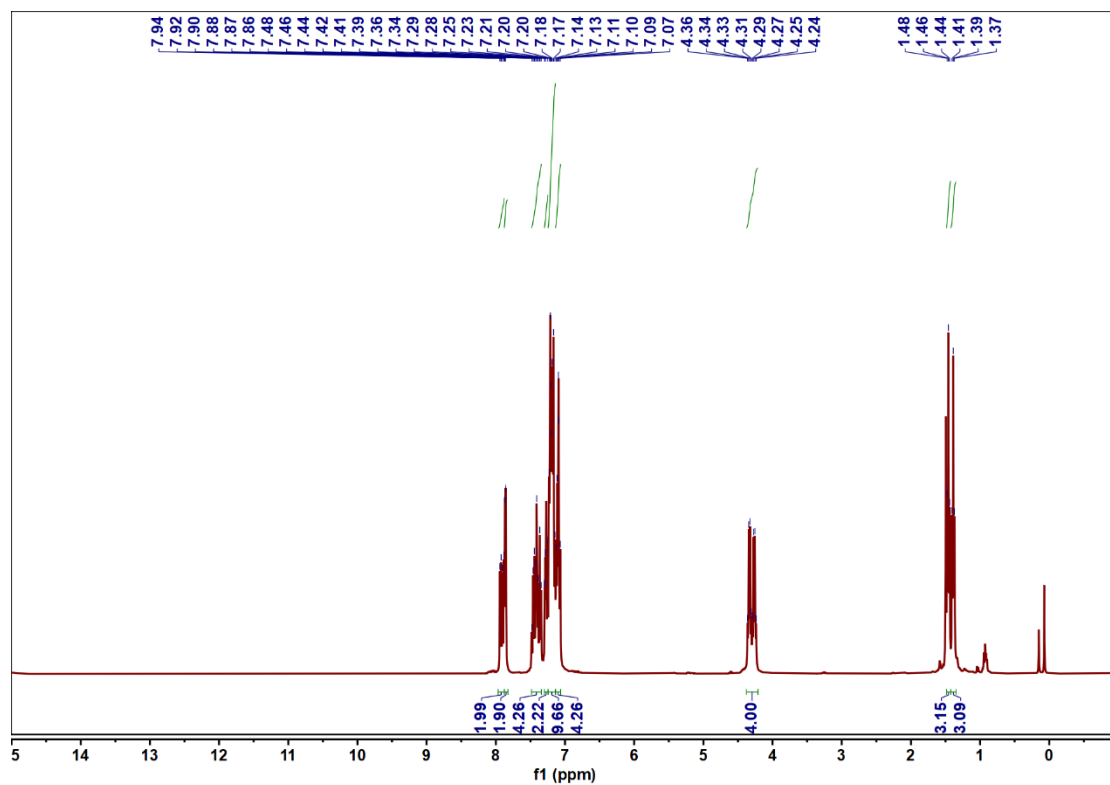

The  $^1\text{H}$  NMR spectrum of Cz-bi-Ph

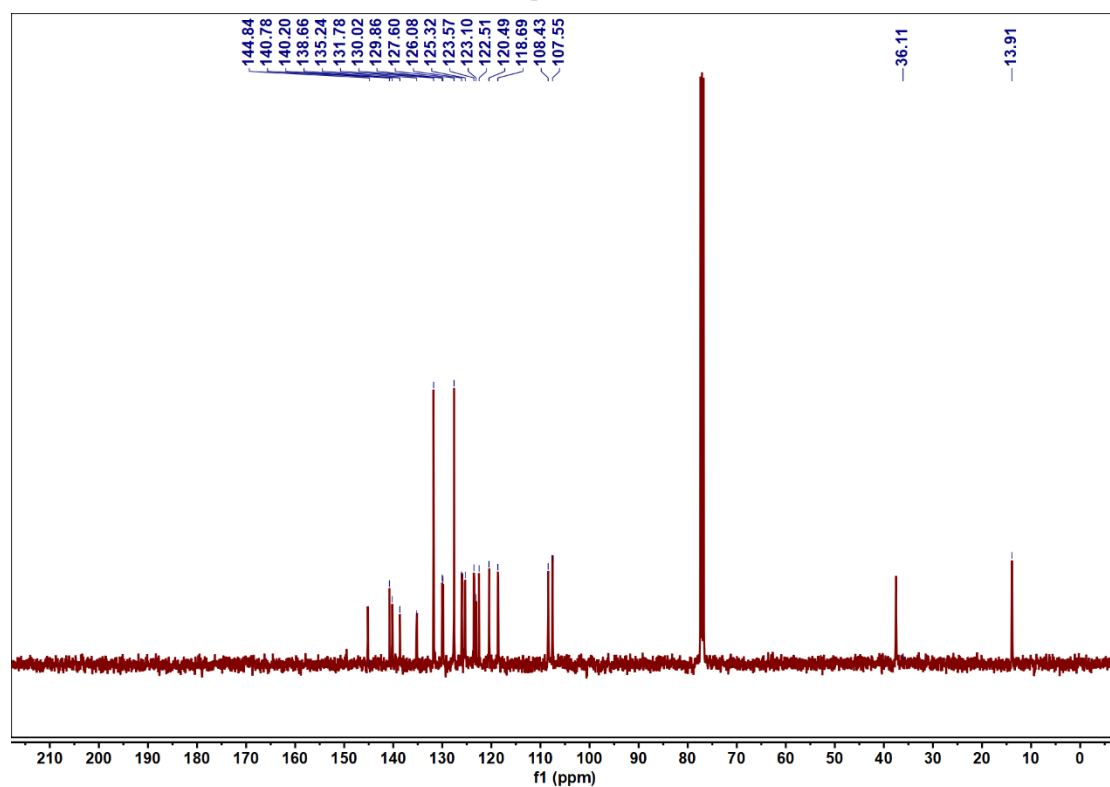

The  $^{13}\text{C}$  NMR spectrum of Cz-bi-Ph

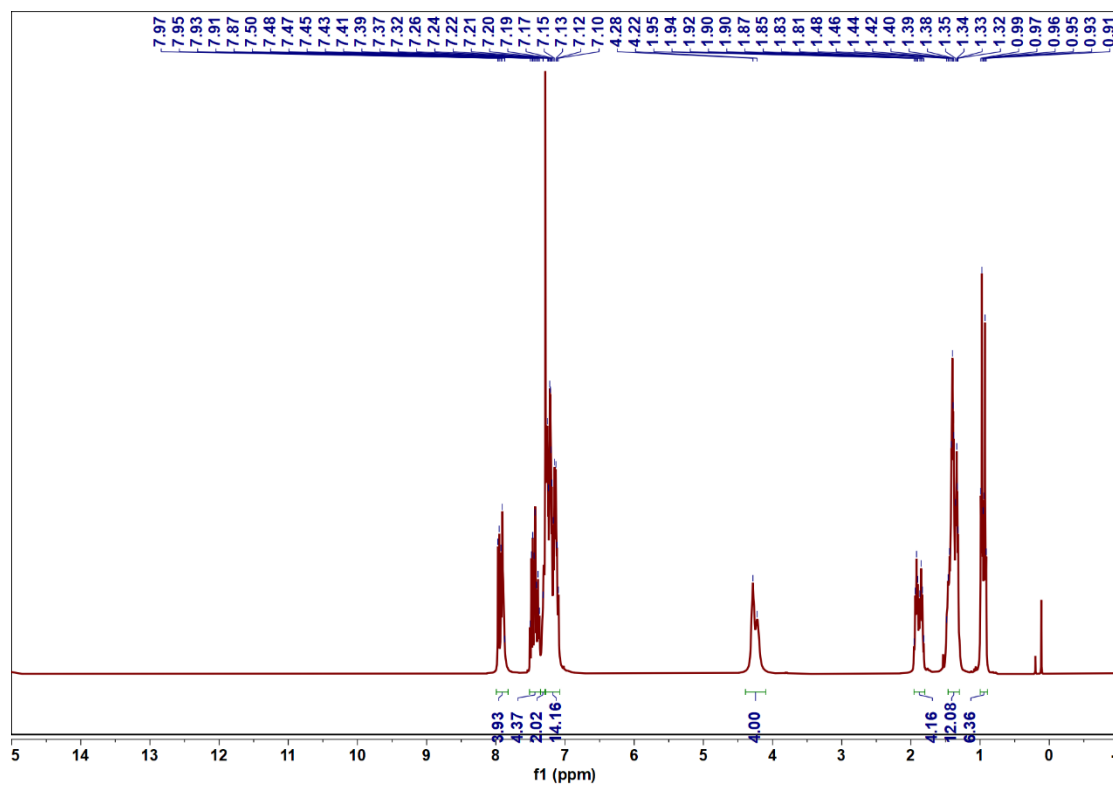

The  $^1\text{H}$  NMR spectrum of Cz-hex-Ph

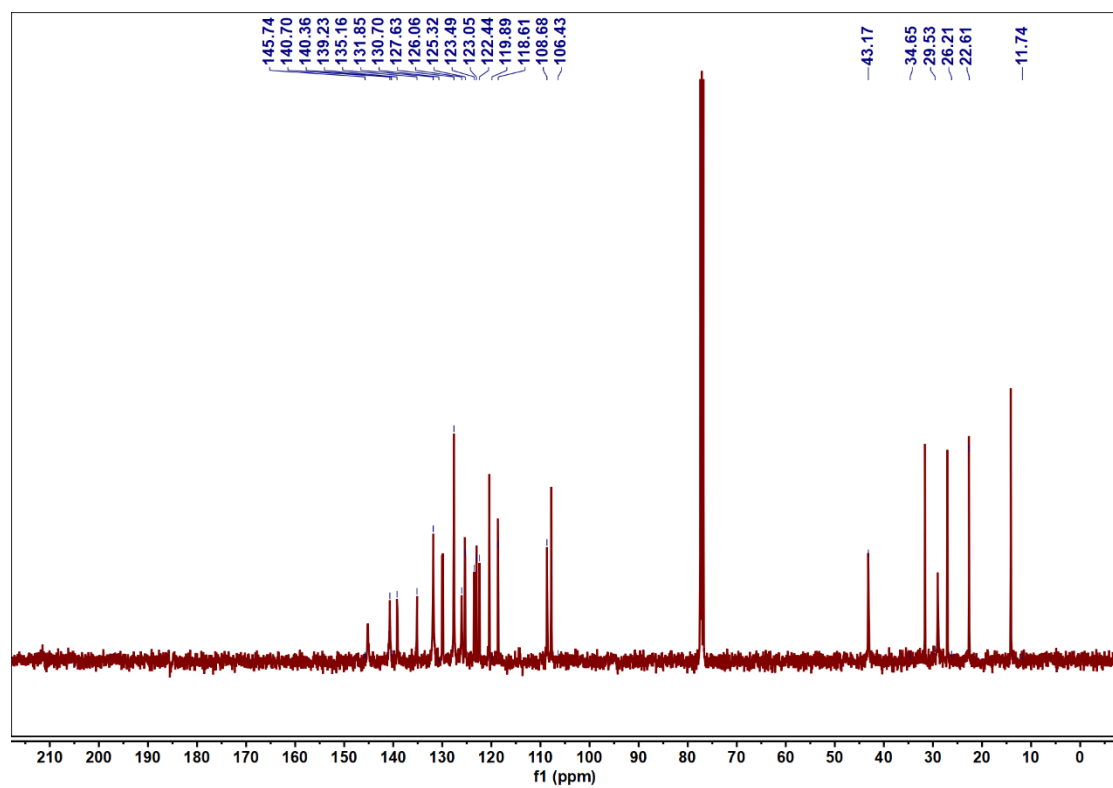

The  $^{13}\text{C}$  NMR spectrum of Cz-hex-Ph

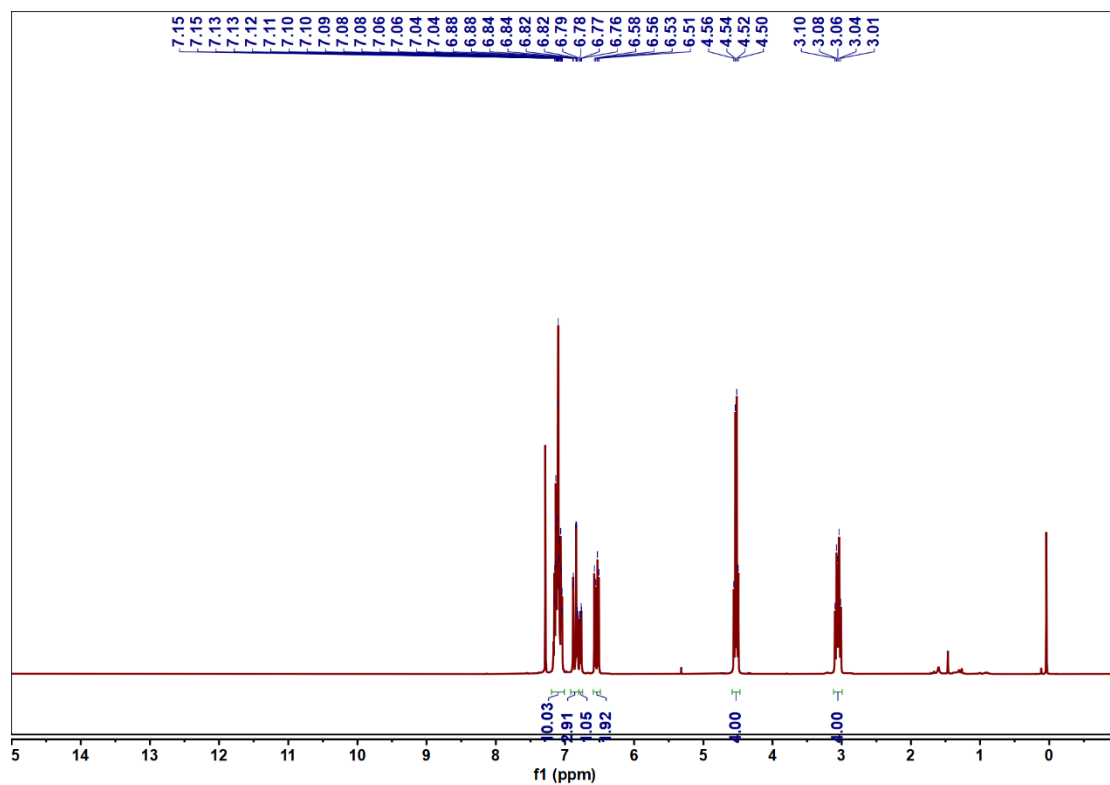

The  $^1\text{H}$  NMR spectrum of **DHBF-Ph**

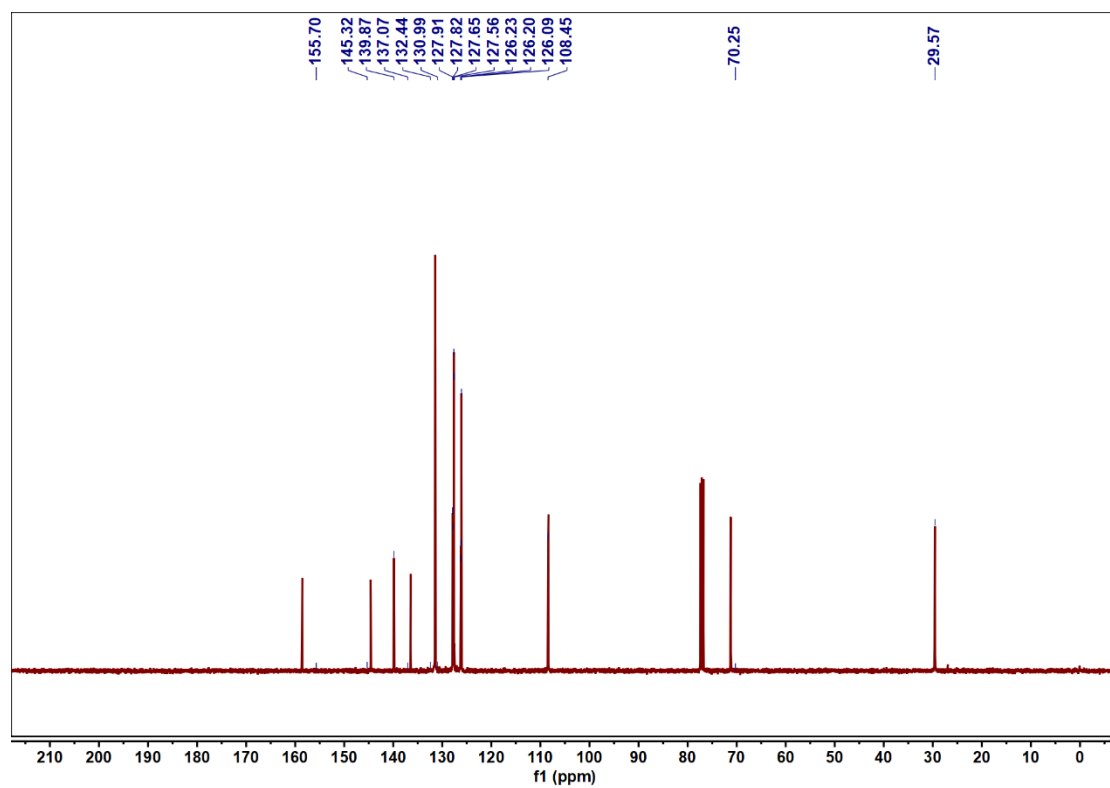

The  $^{13}\text{C}$  NMR spectrum of **DHBF-Ph**

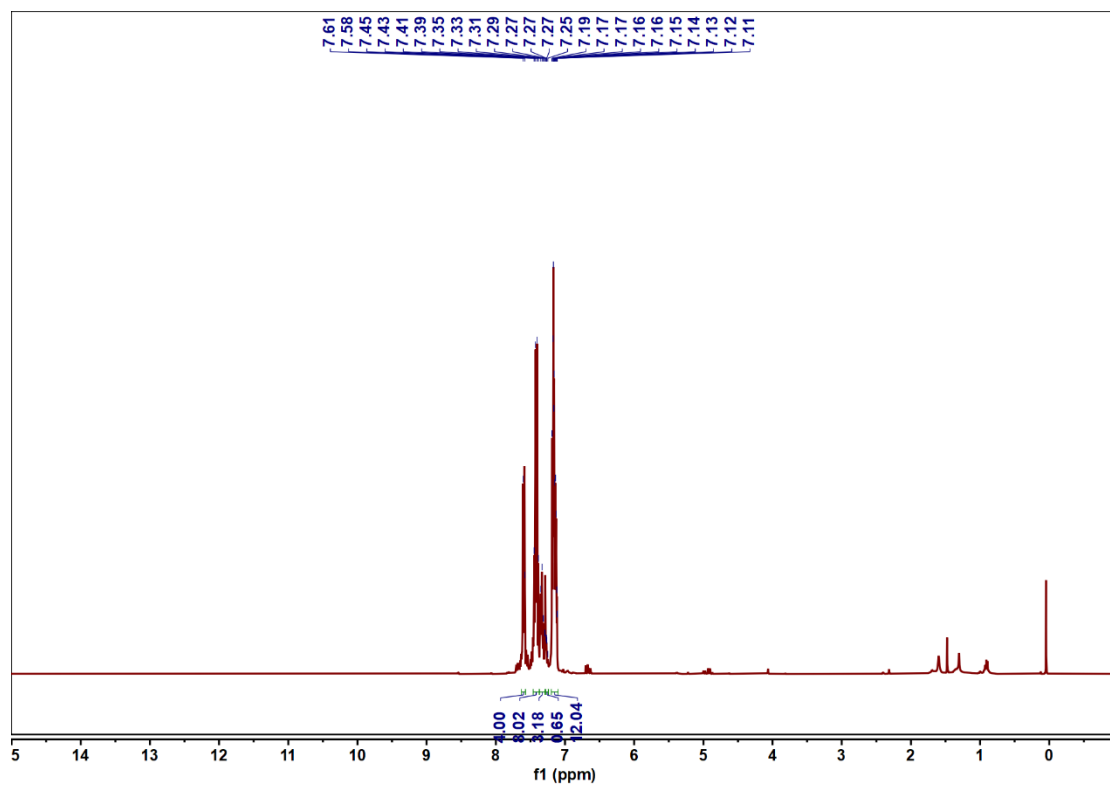

The  $^1\text{H}$  NMR spectrum of **BP-Ph**

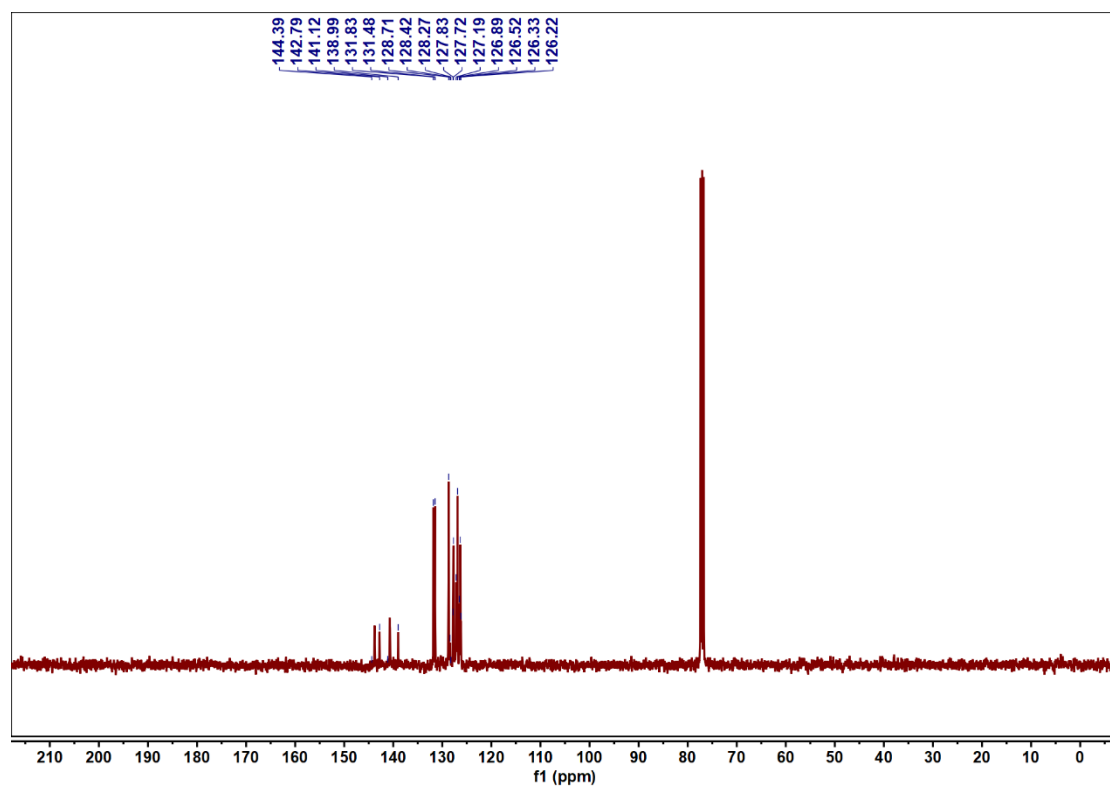

The  $^{13}\text{C}$  NMR spectrum of **BP-Ph**

## 2.2 IR spectra of dyes

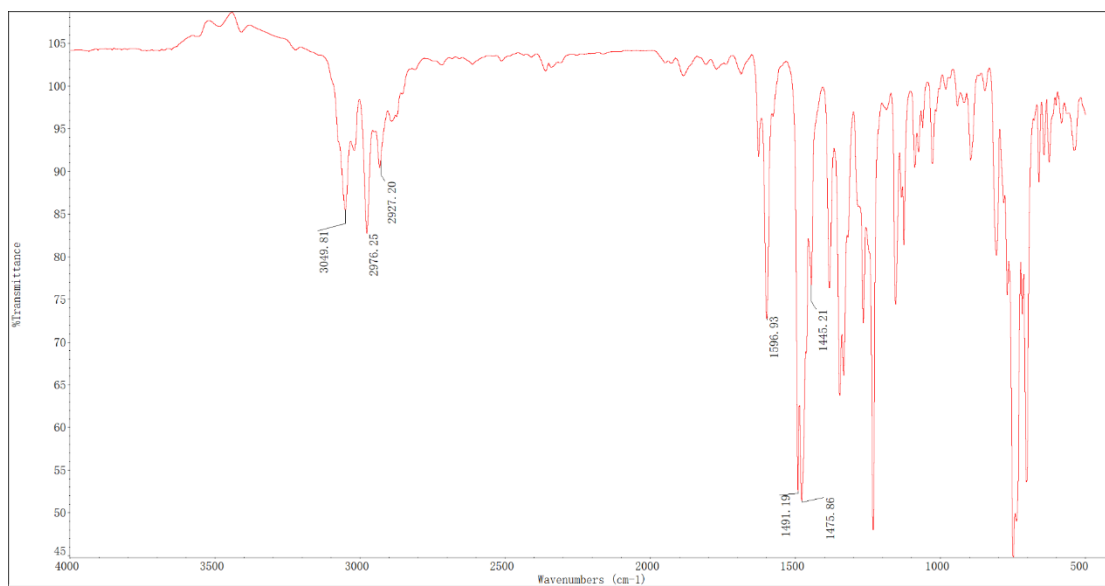

The IR spectrum of Cz-bi-Ph

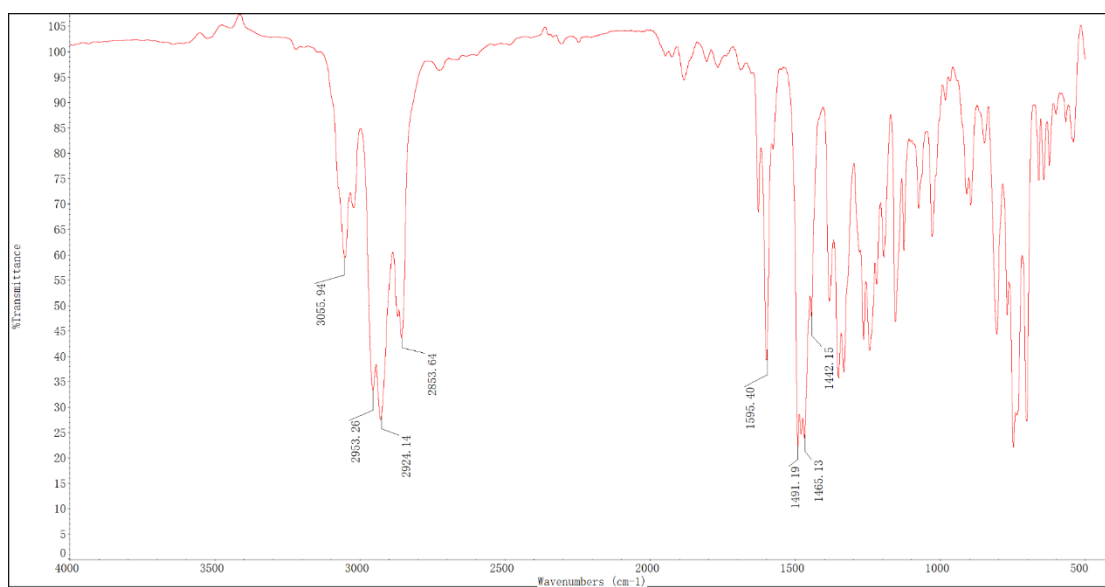

The IR spectrum of Cz-hex-Ph

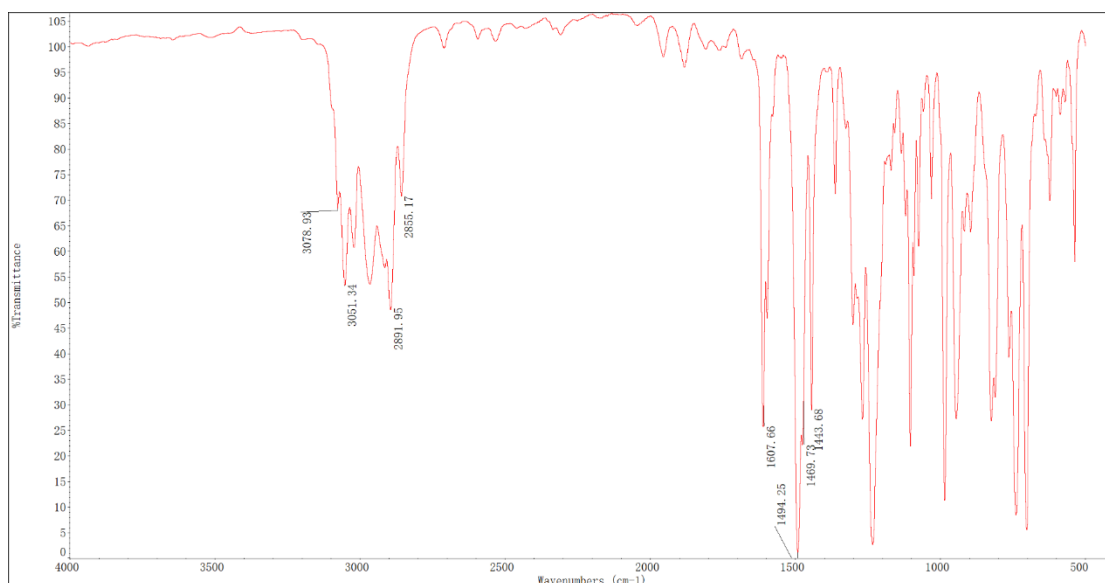

The IR spectrum of **DHBPh**

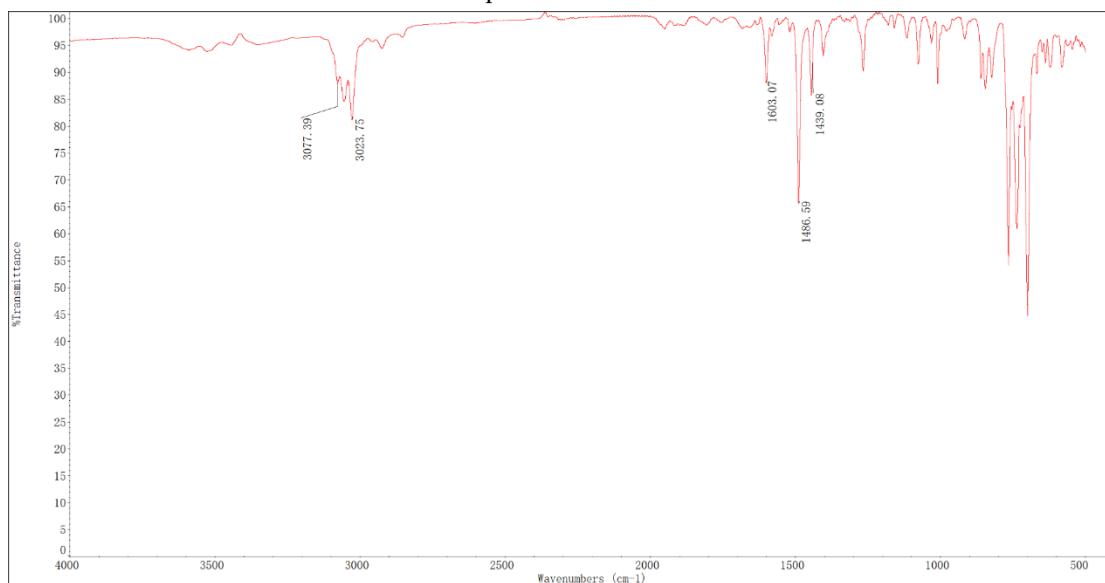

The IR spectrum of **BP-Ph**

### 3. HRMS spectra of dyes



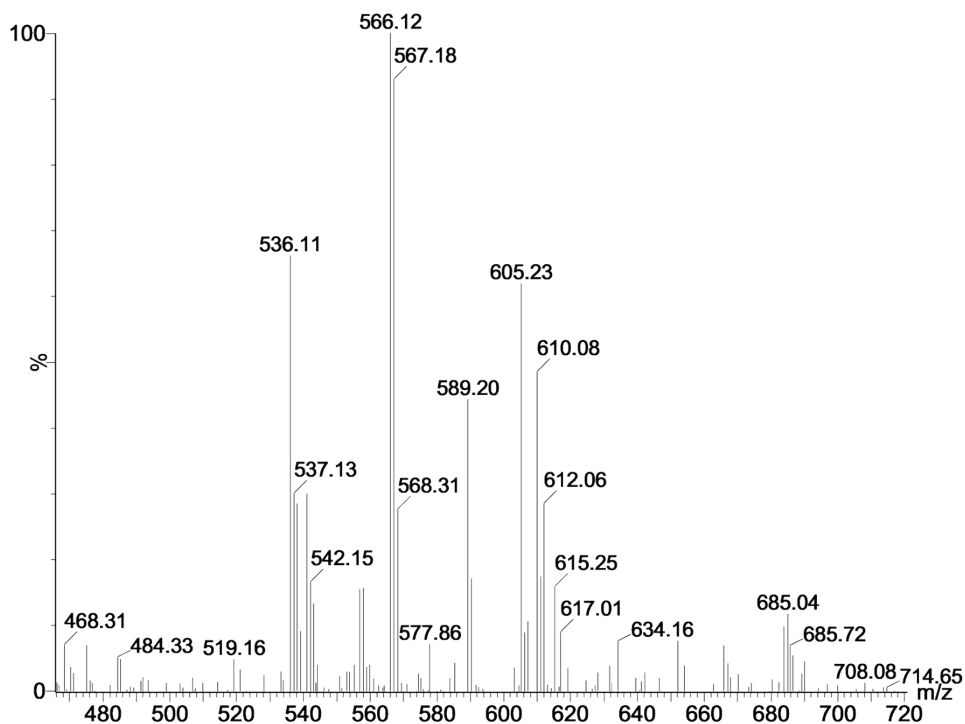

The HRMS spectrum of Cz-bi-Ph

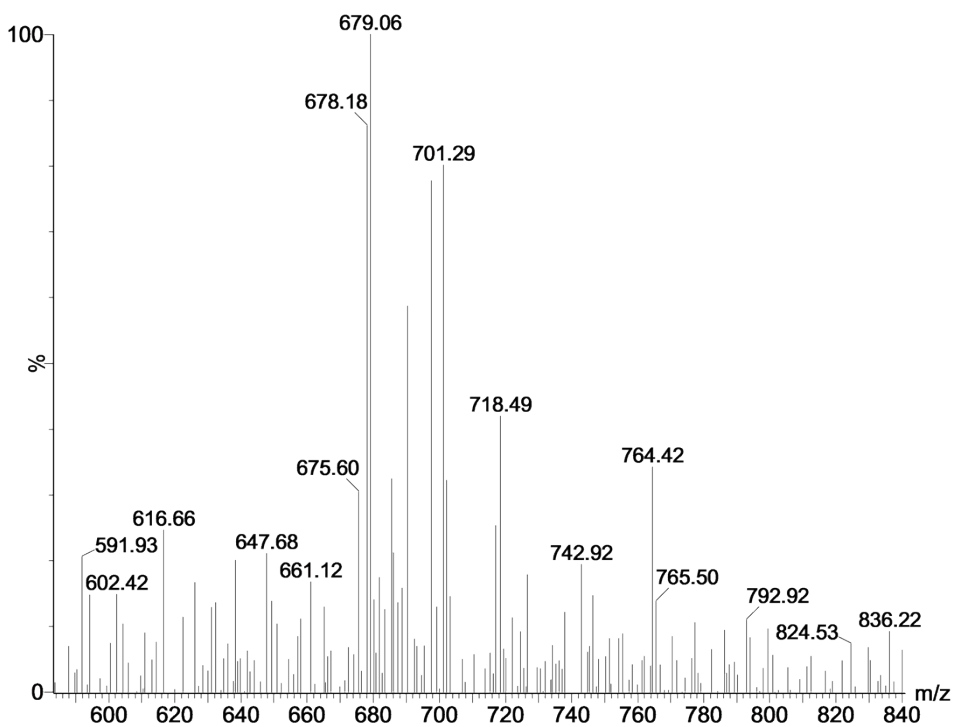

The HRMS spectrum of Cz-hex-Ph

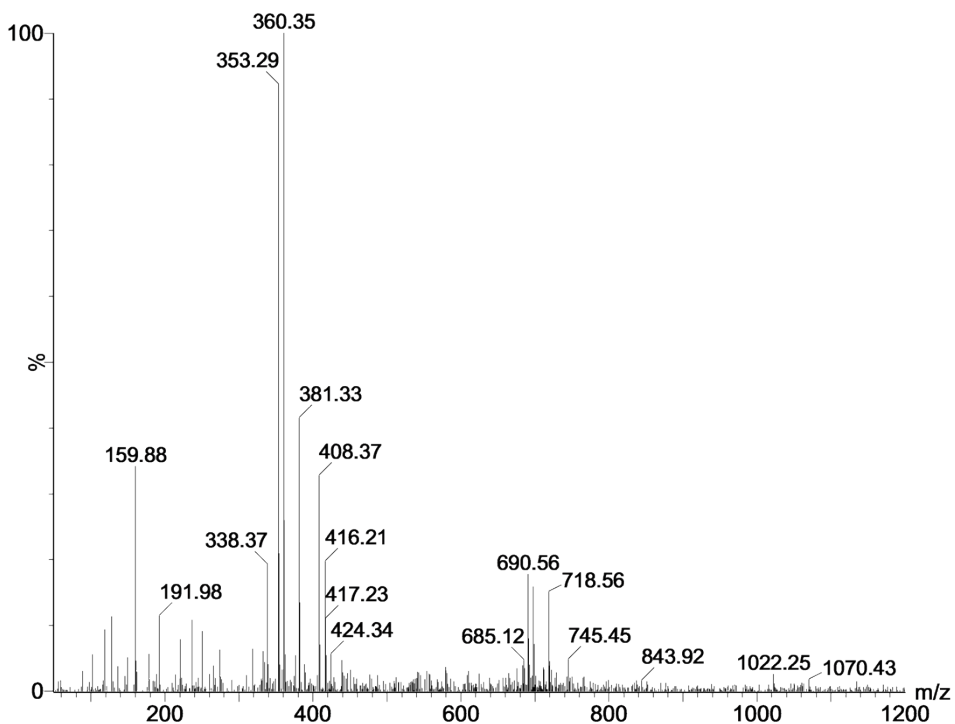

The HRMS spectrum of DHBF-Ph

#### 4. Photochemical property of dyes

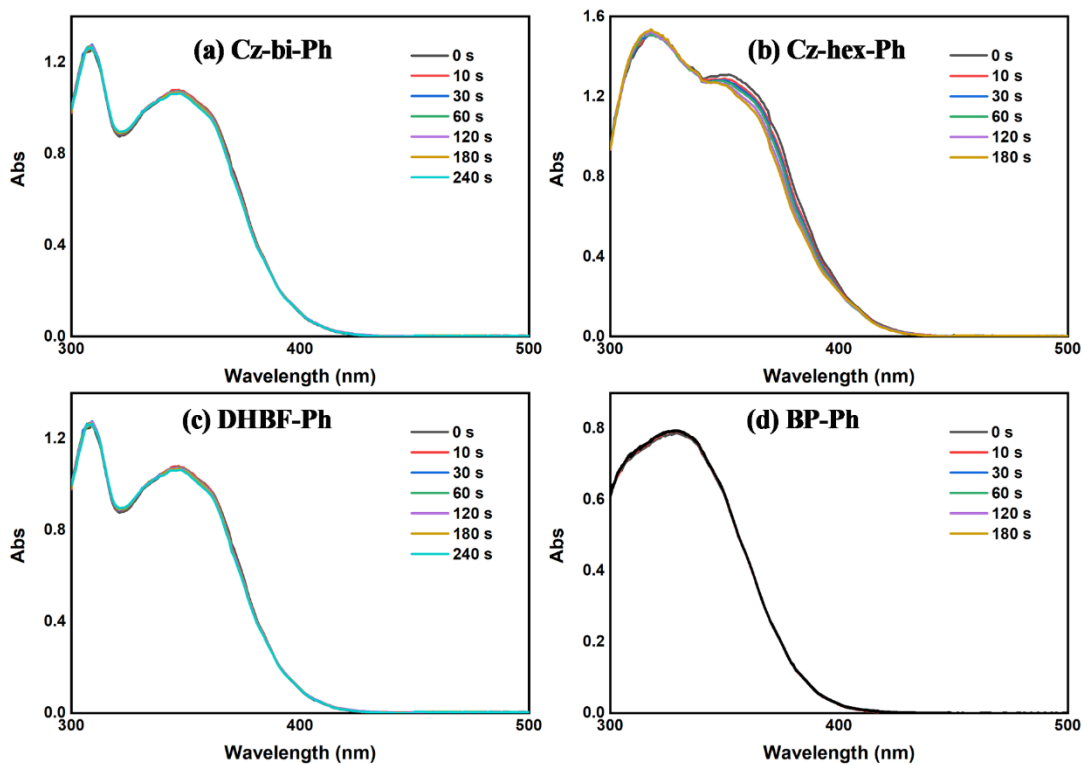

Fig. S1. UV absorption spectrum of (a) Cz-bi-Ph, (b) Cz-hex-Ph, (c) DHBF-Ph, and (d) BP-Ph under 405 nm LED at different time

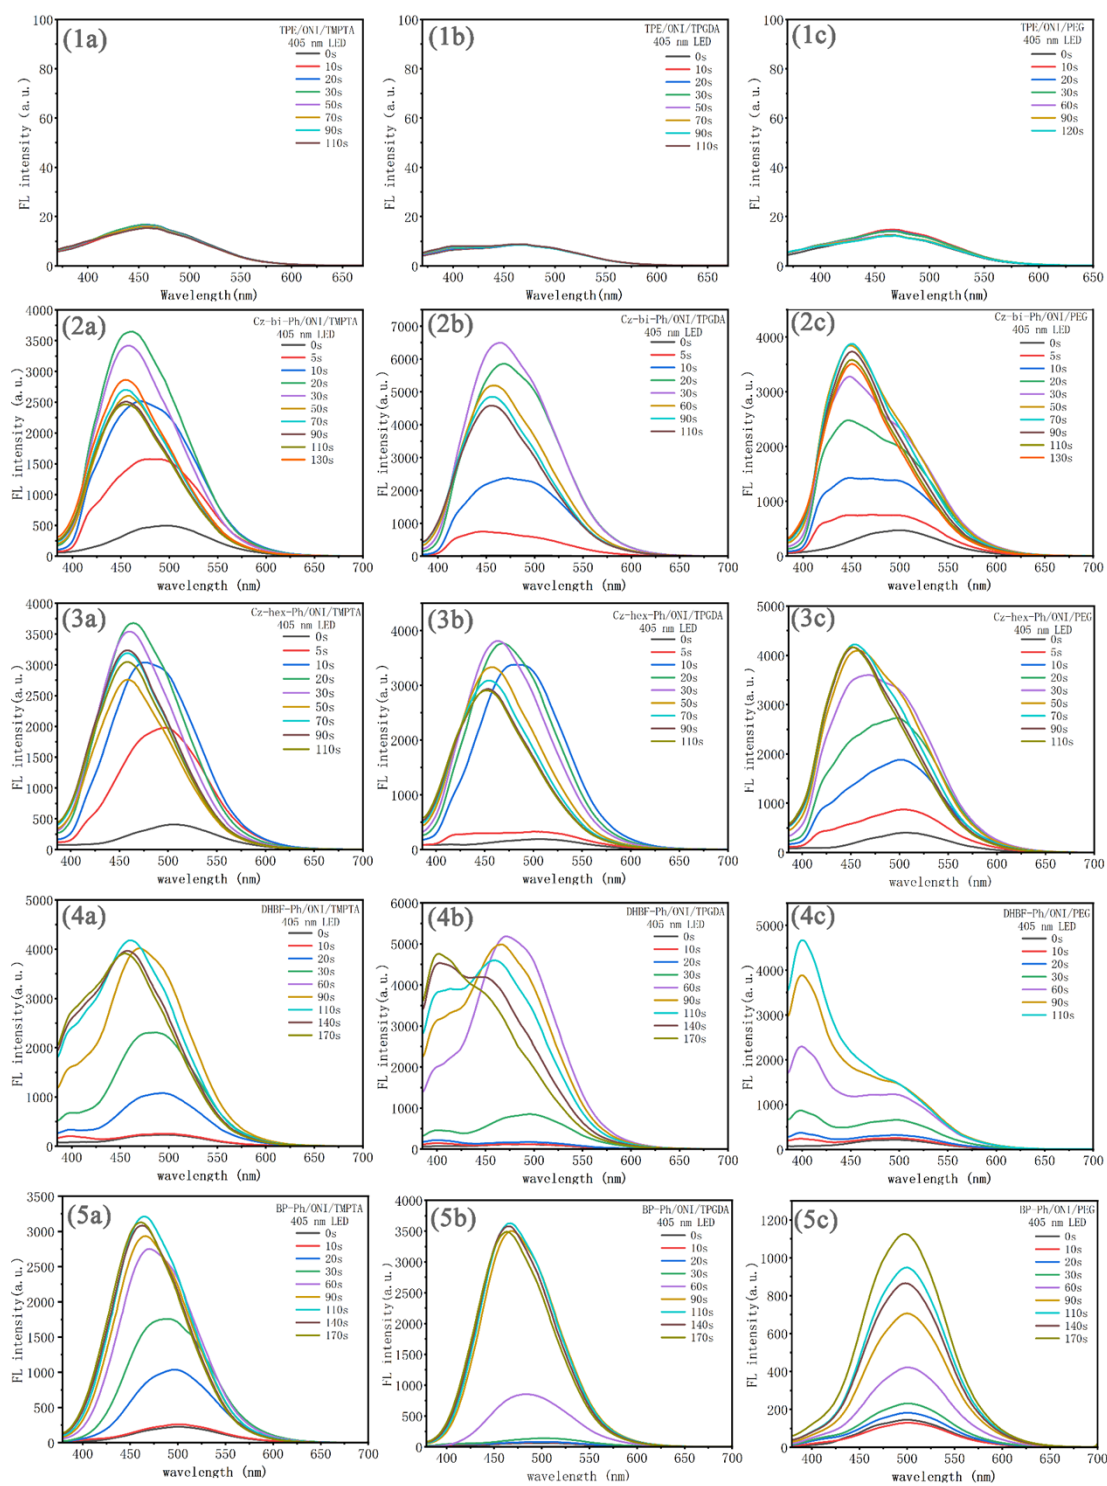

**Fig. S2.** (1a-c) Changes of fluorescence spectra in the photopolymerization of ETPTA initiated by TPE/ONI under 405 nm LED; (2a-c) Changes of fluorescence spectra in the photopolymerization of ETPTA initiated by Cz-bi-Ph/ONI under 405 nm LED; (3a-c) Changes of fluorescence spectra in the photopolymerization of ETPTA initiated by Cz-hex-Ph/ONI under 405 nm LED; (4a-c) Changes of fluorescence spectra in the photopolymerization of ETPTA initiated by DHBF-Ph/ONI under 405 nm LED; (5a-c) Changes of fluorescence spectra in the photopolymerization of ETPTA initiated by

BP-Ph/ONI under 405 nm LED.
